# Supplementary material for: Prognostic simulations of mixed-phase clouds with model 1D-AC v1.0: The impact of freezing parameterizations on ice crystal budgets
Source: Copernicus journal article supplement (doi:10.5194/egusphere-2025-3620), 2025-10-06
Supplement: Supplementary file 1 [file egusphere-2025-3620-supplement.pdf]

Supplementary material for

**Prognostic simulations of mixed-phase clouds with model 1D-AC v1.0: The impact of freezing parameterizations on ice crystal budgets**

Yijia Sun<sup>1</sup>, Ann M. Fridlind<sup>2</sup>, Israel Silber<sup>3</sup>, Nicole Riemer<sup>4</sup>, Daniel A. Knopf<sup>1</sup>

<sup>1</sup>Stony Brook University, Stony Brook, NY 11794, USA

<sup>2</sup>NASA Goddard Institute for Space Studies, New York, NY 10025, USA

<sup>3</sup>Pacific Northwest National Laboratory, Richland, WA 99352, USA

<sup>4</sup>University of Illinois at Urbana-Champaign, Urbana, IL 61801, USA

*Correspondence to:* Daniel A. Knopf (daniel.knopf@stonybrook.edu)

**Contents of this file**

Figures S1 to S7

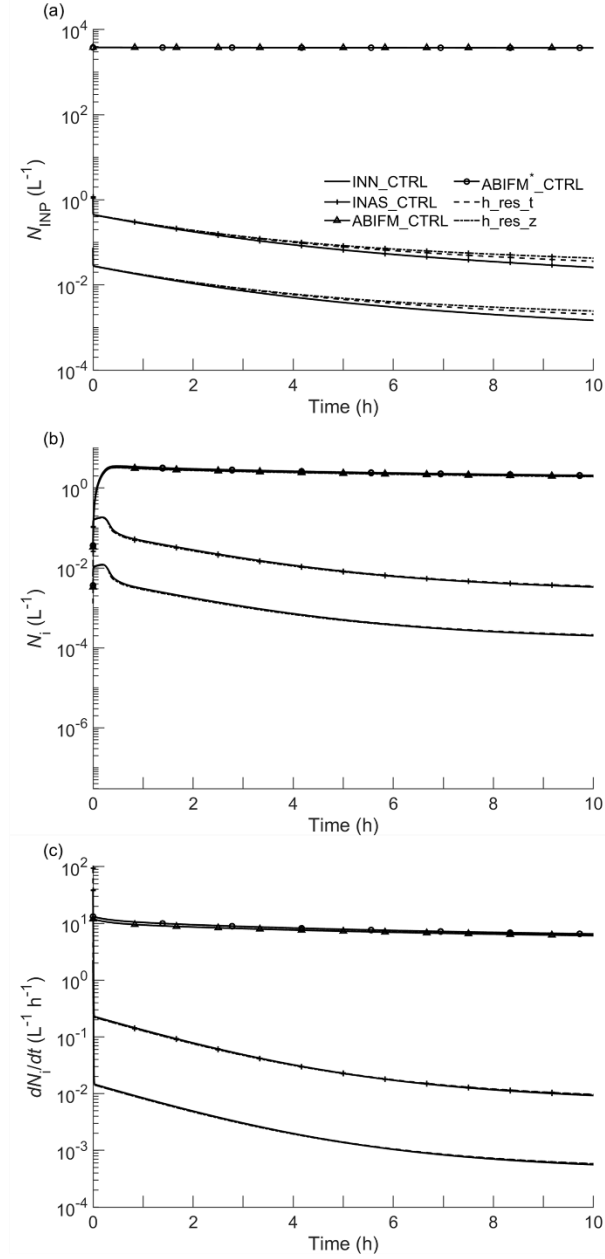

**Figure S1.** Time series of simulated domain averaged (a) activatable INP number concentration ( $N_{INP}$ ), (b) ice crystal number concentration ( $N_i$ ), and (c) ice crystal formation rate ( $dN_i/dt$ ) while applying a time step length ( $\delta t$ ) of 1 s (dash-dotted line) and a vertical resolution ( $\delta z$ ) of 5 m (dashed line). Simulations are all initialized with the same PSD for dust and cloud parameters with the original values. Simulation results include different immersion freezing parameterizations: INN (no symbols), INAS (cross), ABIFM (triangles), ABIFM\* (circles). In all panels, the solid lines indicate simulation results using the original time step and vertical resolution.

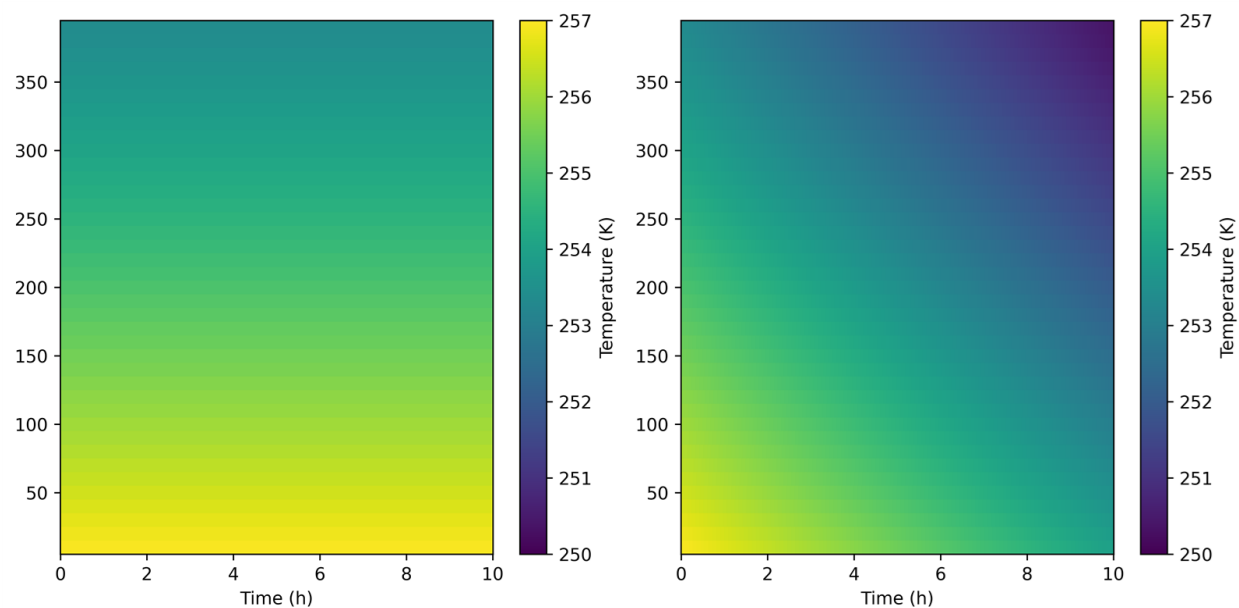

**Figure S2.** The evolution of temperature for respective case studies. (A) Control run (CTRL) (initial temperature profile without cloud cooling rate (CCR)). (B) CCR=0.3 (initial temperature profile with CCR=0.3 °C h<sup>-1</sup> over the whole domain).

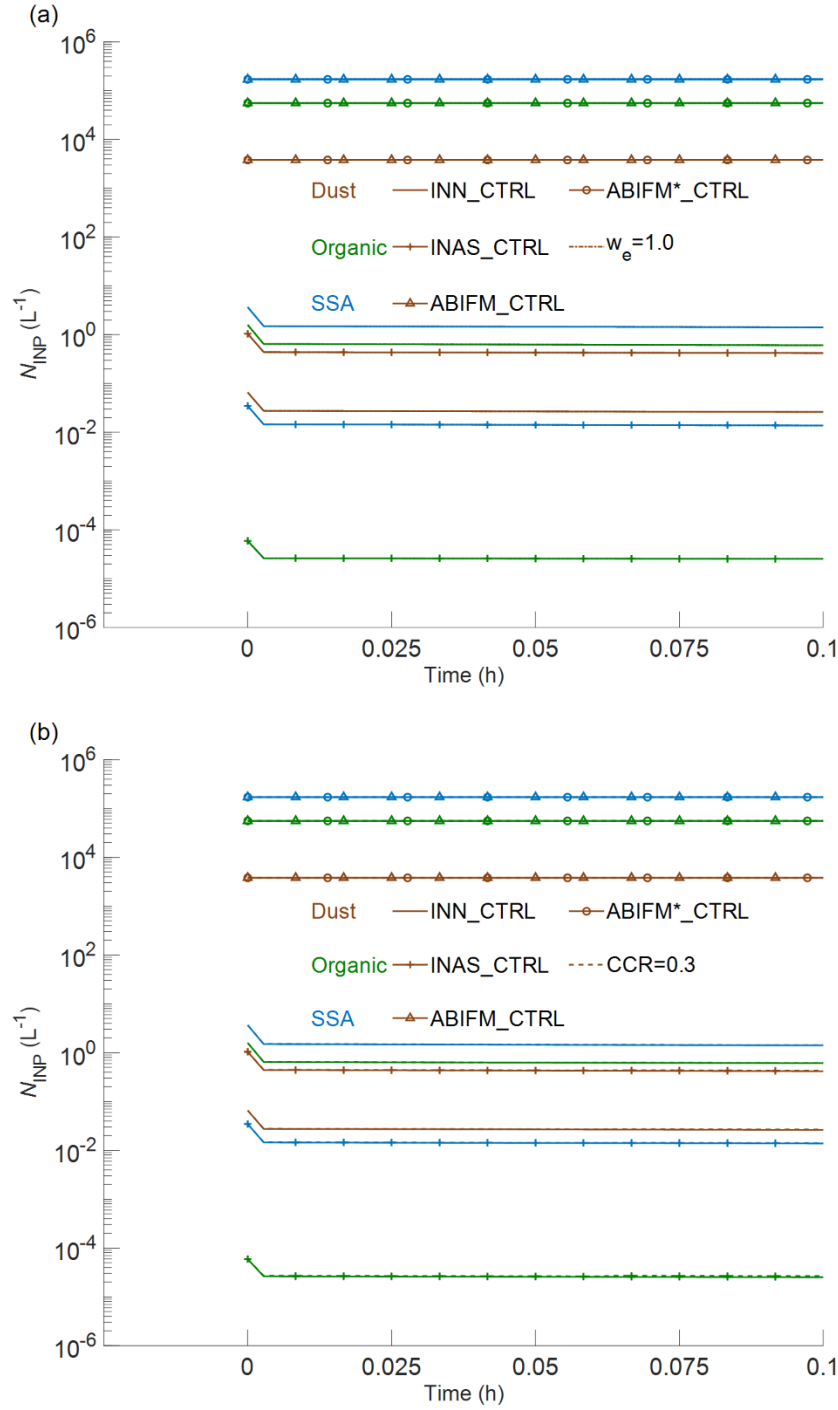

**Figure S3.** Time series of simulated domain-averaged activatable INP number concentration ( $N_{\text{INP}}$  in  $\text{L}^{-1}$ ) for beginning 0.1 hours when changing the cloud-top entrainment rate (a) and cloud cooling rate (b). Simulations are initialized with different aerosol PSDs (dust, organic, and SSA particles), immersion freezing parameterizations (INN, INAS, ABIFM, ABIFM\*) and cloud parameters (cloud cooling rate, cloud-top entrainment rate). Brown, green, and blue lines represent the application of aerosol PSDs of dust, organic, and SSA particles, respectively. Simulation results represent different immersion freezing parameterizations: INN (no symbols), INAS (cross), ABIFM (triangle), and ABIFM\* (circle). In both panels, the thin solid lines indicate results with the original, unperturbed cloud parameters (CTRL). The dashed lines denote results with the cloud cooling rate (CCR) of  $0.3 \text{ } ^\circ\text{C h}^{-1}$  (CCR = 0.3) and the dash-dotted lines show the results with the cloud-top entrainment rate ( $w_e$ ) of  $1 \text{ cm s}^{-1}$  ( $w_e = 1.0$ ).

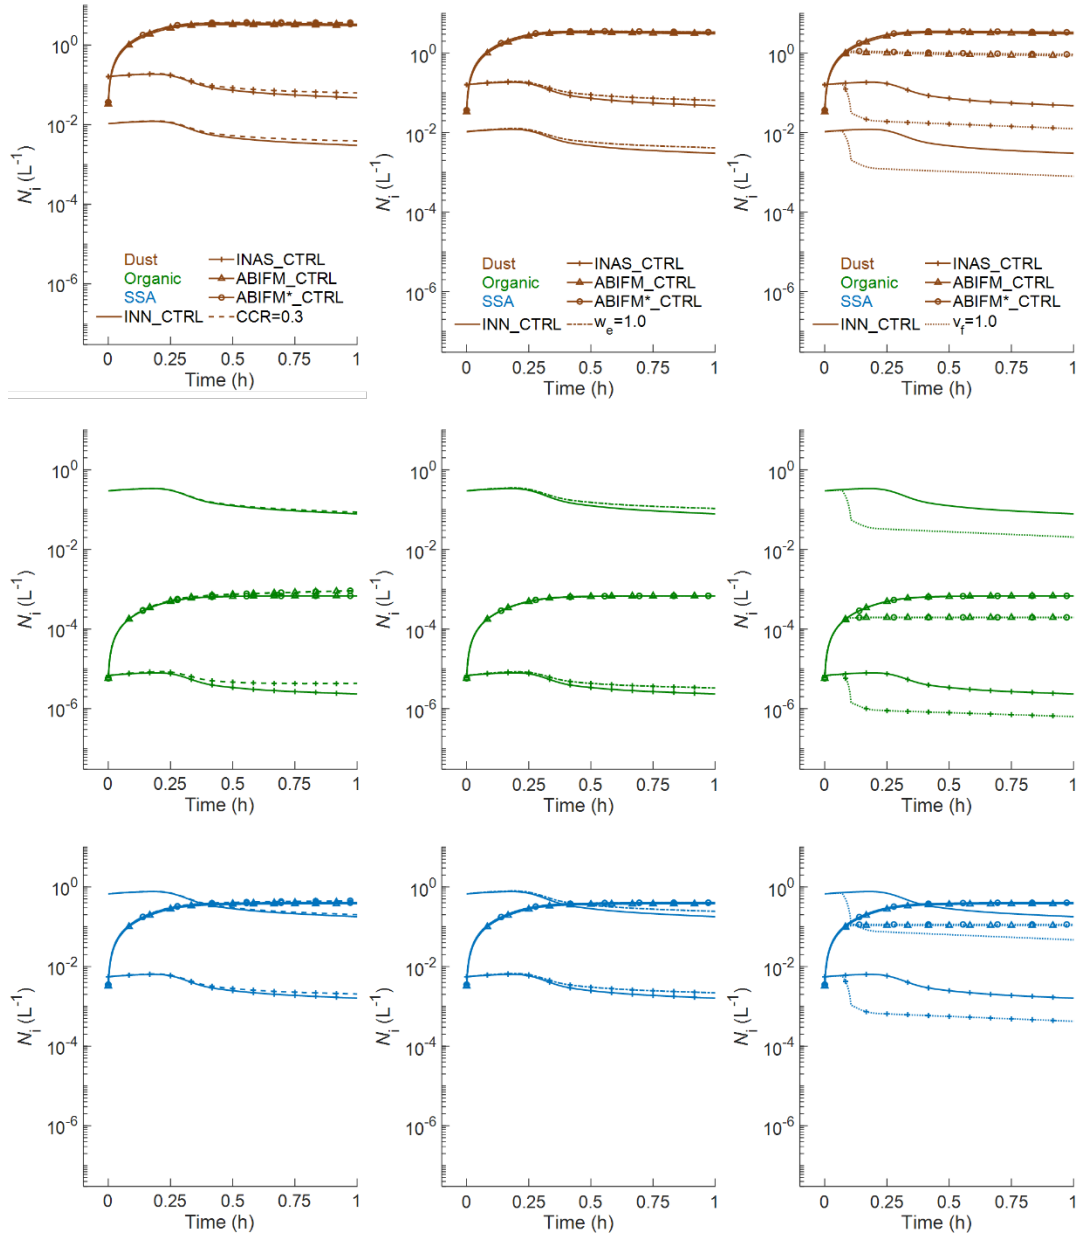

**Figure S4: Temporal evolution of the domain-averaged ice crystal number concentration ( $N_i$  in  $L^{-1}$ ) for initial 1 hours in response to different cloud system parameters. The nine panels are organized by aerosol type in rows (mineral dust, top; organic, middle; and sea spray aerosol (SSA), bottom) and by sensitivity experiment in columns. The columns from left to right represent simulations with an applied cloud cooling rate (CCR), an enhanced entrainment rate ( $w_e$ ), and an increased ice crystal fall speed ( $v_f$ ), respectively. Within each panel, different line styles and colors represent the four immersion freezing (IMF) parameterizations, with legends and styling identical to those used in Figure S3.**

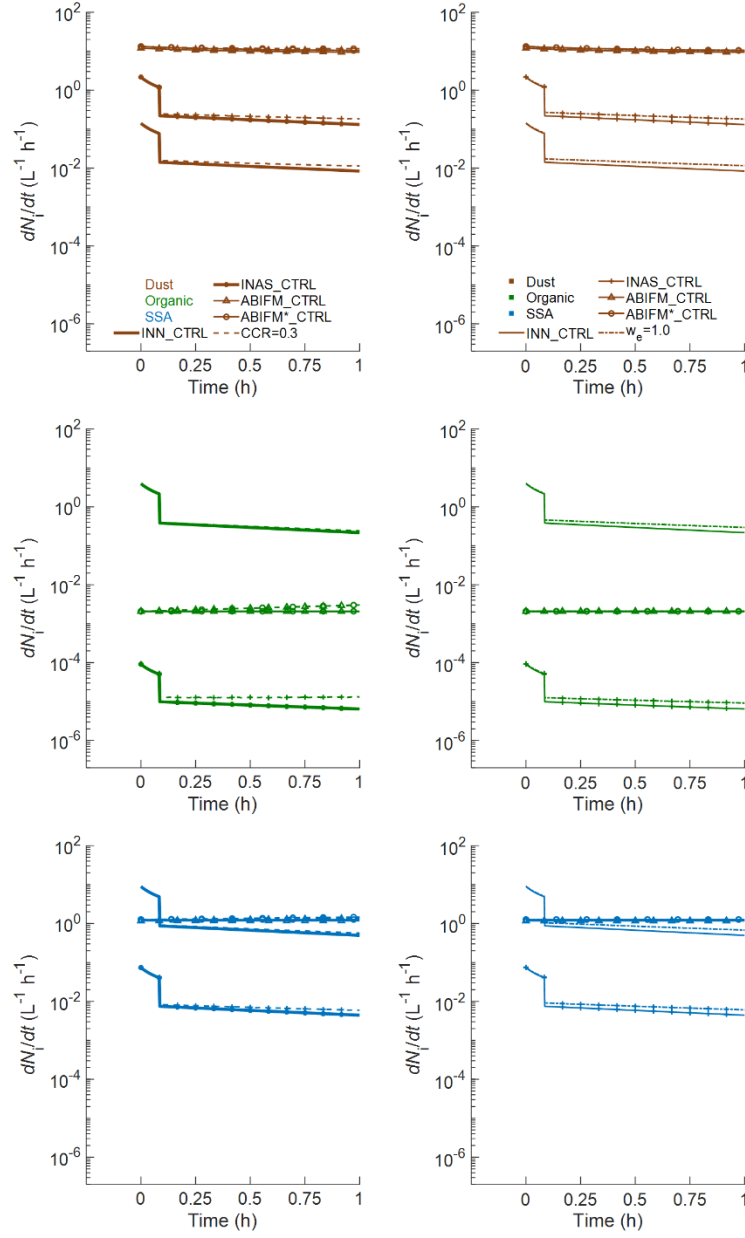

**Figure S5: Temporal evolution of the domain-averaged ice crystal formation rate ( $dN_i/dt$  in  $L^{-1} h^{-1}$ ) for initial 1 hours. The six panels are organized by aerosol types in rows (mineral dust, top; organic, middle; and sea spray aerosol (SSA), bottom) and by sensitivity experiment in columns. The columns from left to right show the response to an applied cloud cooling rate (CCR), and enhanced entrainment rate ( $w_e$ ). Legends and line styles for the four immersion freezing (IMF) parameterizations are identical to those used in Figure S4.**

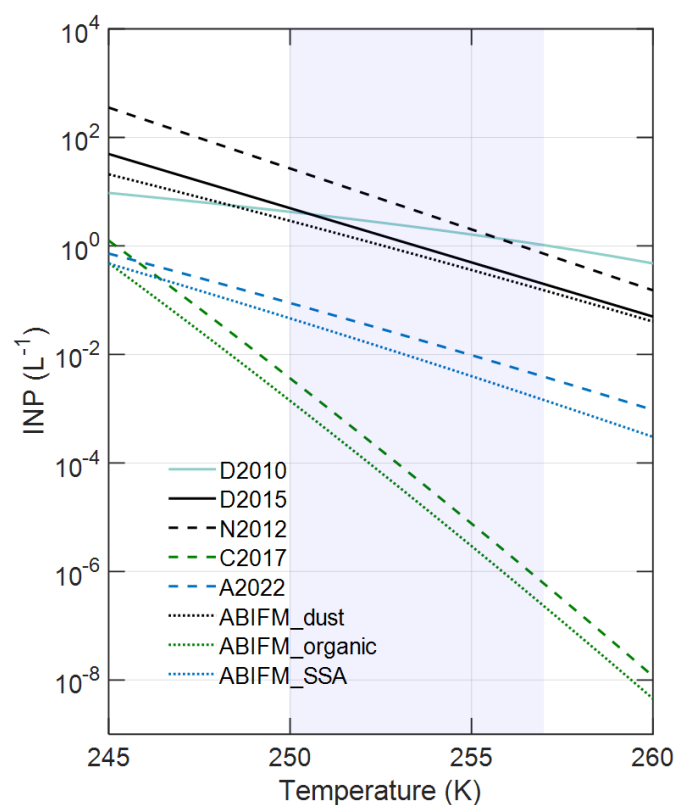

**Figure S6.** The predicted number concentration of INP using the same PSD for respective immersion freezing parameterizations, INN (solid lines), INAS (dashed lines), ABIFM (dotted lines). The chosen activation time for ABIFM is 1 min following the recommendation given in Alpert et al. (2022). Black, blue, and green lines represent the application of dust, organic, and SSA particles. Light blue represents ambient particles. Detailed information is summarized in Table 3. The blue shading indicates the temperature range in the simulation domain. The immersion freezing parameterizations are originally obtained from Demott et al. (2010), Demott et al. (2015), Niemand et al. (2012), China et al. (2017), Alpert et al. (2022), and Alpert et al. (2016).

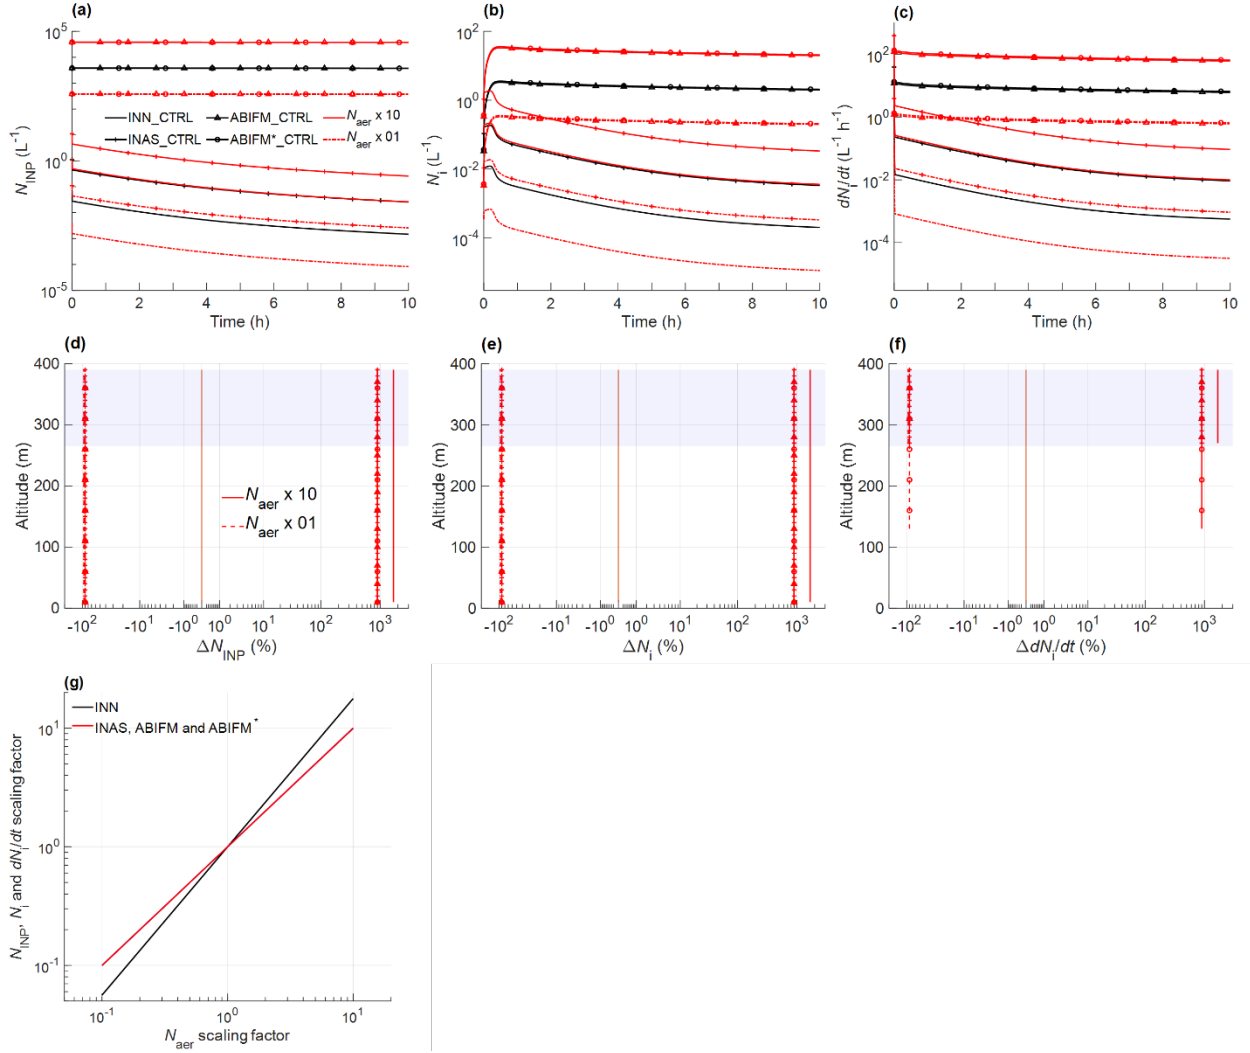



## References

- Alpert, P. A. and Knopf, D. A.: Analysis of isothermal and cooling-rate-dependent immersion freezing by a unifying stochastic ice nucleation model, *Atmos. Chem. Phys.*, 16, 2083-2107, <https://doi.org/10.5194/acp-16-2083-2016>, 2016.
- Alpert, P. A., Kilthau, W. P., O'Brien, R. E., Moffet, R. C., Gilles, M. K., Wang, B., Laskin, A., Aller, J. Y., and Knopf, D. A.: Ice-nucleating agents in sea spray aerosol identified and quantified with a holistic multimodal freezing model, *Sci. Adv.*, 8, eabq6842, <https://doi.org/10.1126/sciadv.abq6842>, 2022.
- China, S., Alpert, P. A., Zhang, B., Schum, S., Dzepina, K., Wright, K., Owen, R. C., Fialho, P., Mazzoleni, L. R., Mazzoleni, C., and Knopf, D. A.: Ice cloud formation potential by free tropospheric particles from long-range transport over the Northern Atlantic Ocean, *J. Geophys. Res.-Atmos.*, 122, 3065-3079, <https://doi.org/10.1002/2016jd025817>, 2017.
- DeMott, P. J., Prenni, A. J., Liu, X., Kreidenweis, S. M., Petters, M. D., Twohy, C. H., Richardson, M. S., Eidhammer, T., and Rogers, D. C.: Predicting global atmospheric ice nuclei distributions and their impacts on climate, *Proc. Nat. Acad. Sci.*, 107, 11217-11222, <https://doi.org/10.1073/pnas.0910818107>, 2010.
- DeMott, P. J., Prenni, A. J., McMeeking, G. R., Sullivan, R. C., Petters, M. D., Tobo, Y., Niemand, M., Möhler, O., Snider, J. R., Wang, Z., and Kreidenweis, S. M.: Integrating laboratory and field data to quantify the immersion freezing ice nucleation activity of mineral dust particles, *Atmos. Chem. Phys.*, 15, 393-409, <https://doi.org/10.5194/acp-15-393-2015>, 2015.
- Niemand, M., Möhler, O., Vogel, B., Vogel, H., Hoose, C., Connolly, P., Klein, H., Bingemer, H., DeMott, P., Skrotzki, J., and Leisner, T.: A Particle-Surface-Area-Based Parameterization of Immersion Freezing on Desert Dust Particles, *J. Atmos. Sci.*, 69, 3077-3092, <https://doi.org/10.1175/Jas-D-11-0249.1>, 2012.
